# Supplementary material for: Therapeutic Potential of Curcumin on the Cognitive Decline in Alzheimer’s Disease: A Study Integrated Meta-Analysis, Network Pharmacology, and Molecular Docking
Source: Research Square preprint supplement (doi:10.21203/rs.3.rs-590600/v1), 2021-06-09
Supplement: Supplementary file 1 [file a53cc04e36227171f2360d4d.xlsx]

## Sheet: Sheet4
Table S1. The relevant characteristics of included trials.
Authors&year	Country	species	Strain	gender	Type of Model	Drug(treated/control)	Main Experiment Groups	Drug Administration	Time of outcome measurement
Ishrat et al.,2009[1]	India	rat	Wistar	Male	ICV-STZ injected	CUR/vehicle	(1)AD + vehicle(n=10); (2)AD + CUR(n=10).	orally, 80 mg/kg, for 3 weeks	2 weeks after model establishment
Wang et al.,2013[2]	China	rat	SD	Male	Aβ1-40 injected	CUR/vehicle (DMSO)	(1)AD + DMSO(n=16); (2)AD + CUR(n=16).	intraperitoneal injection, 300 mg/kg/d, for 7 days	29 days after the start of treatment
Huang et al.,2016[3]	China	rat	SD	Male	ICV-STZ + D-gal injected	CUR/vehicle (saline)	(1)AD +saline(n=8) (2)AD+CUR (n=7)	intraperitoneal injection, 10 mg/kg/d, for 7 weeks	7 weeks after the start of treatment
Isik et al.,2009[4]	Turkey	rat	Wistar	Male	ICV-STZ injected	CUR/vehicle	(1)AD+vehicle(n=7) (2)STZ+CUR(n=8)	intraperitoneal injection, 300 mg/kg/d, for 10 days	Acquisition test: on days 21, 22, 23 and 24 after STZ injection; Retention test: on day 34 of the STZ injection;
Zheng et al.,2017[5]	China	mouse	5×FAD	Male	5×FAD	CUR/vehicle (saline)	(1)AD+saline(n=7) (2)AD+CUR 150 mg/kg/d(n=7) (3)AD+CUR 300 mg/kg/d(n=7)	intragastrically, 150 or 300 mg/kg/d, for 60 days.	after 60 days of treatment
Dong et al.,2012[6]	China	rat	SD	Male	Aged	CUR chow/ standard chow	(1)AD+vehicle(n=15) (2)AD+CUR for 6 weeks(n=15) (3)AD+CUR for 12 weeks(n=15)	orally, 12 mg/rat/d, for 6 weeks or 12 weeks	during the last 10 days of treatment
Zhang et al.,2015[7]	China	rat	SD	Male	Aβ1-42 injected	CUR/vehicle(saline)	(1)AD+saline(n=8) (2)AD+CUR 50mg/kg(n=8) (3)AD+CUR 100mg/kg(n=8) (4)AD+CUR 200mg/kg(n=8)	intraperitoneal injection, 50 or 100 or 200 mg/kg/d, for 7 days	5 days after model establishment
Wang et al.,2017[8]	China	rat	SD	Male	Aβ1-40 injected	CUR /vehicle (saline)	(1)AD+saline(n=16) (2)AD+CUR(n=16)	intraperitoneal injection, 300 mg/kg/d, for 7 days	30 days after model establishment
AHMED et al.,2010[9]	Pakistan	rat	SD	Male	Aβ1-40 + ibotenic acid injected	CUR/vehicle (saline)	(1)AD+saline (2)AD+CUR 3mg/kg/d (3)AD+CUR 30mg/kg/d n=7 - 8 animals in each group	intraperitoneal injection, 3mg/kg or 30 mg/kg/d, for 20 days	On the 15th day of the surgery
Samy et al.,2016[10]	Egypt	rat	Wistar	Male	ICV-STZ injected	CUR/vehicle (saline)	(1)AD+saline(n=8) (2)AD+CUR(n=8)	orally, 80 mg/kg/d, for 3 months	during the last week of therapy
Agrawal et al.,2010[11]	India	rat	SD	Male	ICV-STZ injected	CUR /vehicle	(1)AD+vehicle(n=5) (2)AD+CUR(n=5)	orally, 200mg/kg/d, for 7 days	from 14th to 20th days after 1st STZ injection
Kumar et al.,2007[12]	India	rat	Wistar	Male	Colchicine injected	CUR/vehicle	(1)AD+vehicle (2)AD+CUR 5 mg/kg (3)AD+CUR 10 mg/kg (4)AD+CUR 20 mg/kg (5)AD+CUR 50 mg/kg n=6-8 animals in each group	orally, 5, 10, 20,or 50 mg/kg,twice daily, for 25 days.	on day13,day14 and day 21 following colchicine injections
Nam et al.,2014[13]	South Korea	mouse	C57BL/6	Male	D-gal-induced	CUR/vehicle (saline)	(1)AD+saline(n=5) (2)AD+CUR(n=5)	orally, 300 mg/kg/d, for 3 weeks	At the 10th week after D-gal administration
Yin et al.,2014[14]	China	rat	SD	Male	Aβ1-40 injected	CUR/vehicle (DMSO)	(1)AD+DMSO(n=16) (2)AD+CUR(n=16)	intraperitoneal injection, 300 mg/kg/d, for 7 days	after 1 month of modeling
Sun et al.,2013[15]	China	mouse	SAM	Male	SAMP8	CUR/vehicle (corn oil)	(1)AD+corn oil(n=22) (2)AD+CUR20 mg/kg/d(n=22) (3)AD+CUR50 mg/kg/d(n=22)	intragastrically, 20 or 50 mg/kg/d, for 25 days	On the 2th day after the last administration
Rajasekar et al.,2013[16]	India	mouse	Swiss albino	Male	OKA injected	CUR /vehicle	(1)AD+vehicle (2)AD+CUR n = 6–8 animals in each group	orally, 50 mg/kg/d, for 13 days	on 13th day of post OKA administration
Awasthi et al.,2010[17]	India	mouse	Swiss albino	Male	ICV-STZ injected	CUR /vehicle	(1)AD+vehicle (2)AD+CUR10 (3)AD+CUR20 (4)AD+CUR50 n = 6–8 animals in each group	orally, 10, 20 or 50 mg/kg/d, for 21 days	starting from the 26th day to the 30th day of the experiment
Kumar et al.,2009[18]	India	rat	Wistar	Male	Aluminium treated	CUR /vehicle	(1)AD+vehicle(n=7) (2)AD+CUR 30mg/kg/d(n=7) (3)AD+CUR 60mg/kg/d(n=7)	orally, 30 or 60 mg/kg/d, for 6 weeks	on the 21st and 42nd day of the study
Khurana et al.,2012[19]	India	rat	Wistar	Male	colchicine injected	CUR/vehicle (CMC)	(1)AD+vehicle(n=8); (2)AD+CUR 100 mg/kg(n=8) (3)AD+CUR 200 mg/kg (n=8) (4)AD+CUR 400 mg/kg(n=8)	orally, 100, 200 or 400 mg/kg twice daily,for 28 days.	on day13, day 14 and day 21 following central administration of colchicine
Rinwa et al.,2010[20]	India	mouse	Swiss albino	mixed	ICV-STZ injected	CUR/vehicle (CMC)	(1)AD+CMC(n=10) (2)AD+CUR(n=10)	orally, 20 mg/kg/d, for 14 days	after 14 days of treatment
Wang et al.,2014[21]	China	mouse	APP/PS1	mixed	APP/PS1	CUR/vehicle(CMC)	(1)AD+CMC(n=12) (2)AD+CUR 100mg/kg/d(n=12) (3)AD+CUR 200mg/kg/d(n=12) (4)AD+CUR 400mg/kg/d(n=12)	orally, 100, 200 or 400 mg/kg/d, for 3 months.	after 3 months of treatment
Elham et al.,2011[22]	Egypt	rat	albino	mixd	Scopolamine injected	CUR/vehicle (CMC)	(1)AD+CMC(n=12) (2)AD+CUR 50mg/kg/d(n=12) (3)AD+CUR 100mg/kg/d(n=12)	orally, 50 or 100mg/kg/d, for 2 weeks.	after 2 weeks of treatment
Otilia et al.,2014[23]	India	rat	Wistar	Not reported	D-gal induced	CUR/vehicle	(1)AD+vehicle(n=10) (2)AD+CUR (n=10)	orally, 50mg/kg/d, for 63 days	Not reported
Liu et al.,2016[24]	China	mouse	APP/PS1	Not reported	APP/PS1	CUR/vehicle	(1)AD+vehicle(n=10) (2)AD+CUR (n=10)	intraperitoneal injection, 150 mg/kg/d, for 4 weeks.	after 4 weeks of treatment
Zhang et al.,2017[25]	China	mouse	APP/PS1	mixd	APP/PS1	CUR/vehicle	(1)AD+vehicle(n=10) (2)AD+CUR(n=10)	orally, 200mg/kg/d, for 3 month.	after 3 month of treatment
Belviranlı et al.,2013[26]	Turkey	rat	Wistar	Female	Aged	CUR/vehicle (corn oil)	(1)AD+corn oil(n=10) (2)AD+CUR(n=10)	orally, 300mg/kg/d, for 12 days.	after 7 days of treatment
Wang et al.,2014[27]	China	mouse	APP/PS1	mixd	APP/PS1	CUR chow/ standard chow	(1)AD+vehicle(n=11) (2)AD+CUR160ppm(n=11) (3)AD+CUR1000ppm(n=11)	orally, 160ppm or 1000ppm, for 6 months.	Not reported
Frautschy et al.,2001[28]	United State	rat	SD	Female	Aβ infused	CUR chow/ control chow	(1)AD+vehicle(n=10) (2)AD+CUR(n=10)	orally, 500ppm, for 2 months.	Not reported
Lu et al., 2019[29]	China	mouse	APP/PS1	mixd	APP/PS1	CUR/vehicle (PBS)	(1)AD+PBS(n=8) (2)AD+CUR(n=8)	intraperitoneal injection, 50 mg/kg/d, for 4 weeks	Not reported
Liu et al.,2018[30]	China	mouse	Kunming	Male	AlCl3 injected	CUR/vehicle (saline)	(1)AD+PBS(n=20) (2)AD+CUR(n=20)	intraperitoneal injection, 10 mg/kg/d, for 3 days	day 14 after model establishment
Li et al.,2019[31]	China	mouse	APP/PS1	mixd	APP/PS1	CUR/vehicle (PEG)	(1)AD+PEG(n=20) (2)AD+CUR(n=20)	orally, 150mg/kg/d, for 42 days.	Not reported
Wang et al.,2019[32]	China	mouse	C57BL/6	Male	OKA injected	CUR/vehicle (saline)	(1)AD+vehicle(n=3) (2)AD+CUR(n=3)	intraperitoneal injection, 20 ug/d, for 7 days	12 days after model establishment
Giacomeli et sl.,2019[33]	Brazil	mouse	Swiss Albino	Female	Aβ1-42 injected	CUR /vehicle (saline)	(1)AD+saline(n=8) (2)AD+CUR(n=8)	orally, 50mg/kg/d, for 14 days	15 days after Aβ1-42 injection
